# Supplementary material for: Neonatal Nutrition Predicts Energy Balance in Young Adults Born Preterm at Very Low Birth Weight
Source: MDPI journal article supplement (doi:10.3390/nu9121282), 2017-11-24
Supplement: s1 [file s1]

## Neonatal nutrition and energy balance in young adults born preterm at very low birth weight

Hanna-Maria Matinolli, Petteri Hovi, Esko Levälahti, Nina Kaseva, Patricia P Silveira, Katri Hemiö, Anna-Liisa Järvenpää, Johan G Eriksson, Sture Andersson, Jaana Lindström, Satu Männistö, Eero Kajantie.

Supplementary material:

**Table S1.** The association between the intakes of energy and nutrients during the first three weeks of life and food and nutrient intake in adulthood.

**Table S2.** Sensitivity analysis results for effects of protein intake and fat intake on relative energy intake

**Figure S1.** Graphical representation of path model estimated for total energy intake, body weight with four time points and relative energy intake (n= 109)

**Figure S2.** Graphical representation of path model estimated for protein intake during the first three weeks of life, body weight with four time points and relative energy intake in adult age (N= 109)

## Supplementary material

**Table S1.** The association between the intakes of energy and nutrients during the first three weeks of life and food and nutrient intake in adulthood.

|                               | Mean <b>energy</b> intake during<br>the first three weeks of life<br>(10kcal/kg/d) |      | Mean <b>protein</b> intake during<br>the first three weeks of life<br>(g/kg/day) |      | Mean <b>fat</b> intake during the<br>first three weeks of life<br>(g/kg/day) |      | Mean <b>carbohydrate</b> intake<br>during the first three weeks of<br>life (g/kg/day) |      |
|-------------------------------|------------------------------------------------------------------------------------|------|----------------------------------------------------------------------------------|------|------------------------------------------------------------------------------|------|---------------------------------------------------------------------------------------|------|
|                               | Mean diff (95% CI)                                                                 | p    | Mean diff (95% CI)                                                               | p    | Mean diff (95% CI)                                                           | p    | Mean diff (95% CI)                                                                    | p    |
| <b>Energy intake</b> (kcal/d) |                                                                                    |      |                                                                                  |      |                                                                              |      |                                                                                       |      |
| Model 1                       | -19.5 (-76.8; 37.7)                                                                | 0.50 | 9.0 (-243.6; 261.5)                                                              | 0.94 | -19.0 (-99.1; 61.1)                                                          | 0.64 | 3.3 (-66.4; 73.1)                                                                     | 0.92 |
| Model 2                       | -59.9 (-126.2; 6.4)                                                                | 0.08 | -73.3 (-352.1; 205.5)                                                            | 0.60 | -63.1 (-153.8; 27.5)                                                         | 0.17 | -8.9 (-83.3; 65.5)                                                                    | 0.81 |
| Model 3                       | -72.2 (-140.1; -4.2)                                                               | 0.04 | -121.1 (-406.7; 164.5)                                                           | 0.40 | -87.9 (-181.3; 5.5)                                                          | 0.06 | -9.2 (-84.4; 66.0)                                                                    | 0.81 |
| <b>Fat</b> (E%)               |                                                                                    |      |                                                                                  |      |                                                                              |      |                                                                                       |      |
| Model 1                       | -0.2 (-1.0; 0.6)                                                                   | 0.61 | -0.5 (-4.2; 3.1)                                                                 | 0.77 | -0.3 (-1.4; 0.9)                                                             | 0.63 | 0.1 (-0.9; 1.1)                                                                       | 0.80 |
| Model 2                       | -0.4 (-1.3; 0.6)                                                                   | 0.46 | -1.0(-5.1; 3.0)                                                                  | 0.61 | -0.4 (-1.7; 0.9)                                                             | 0.56 | -0.1 (-1.2; 0.9)                                                                      | 0.82 |
| Model 3                       | -0.3 (-1.4; 0.7)                                                                   | 0.49 | -1.2 (-5.4; 2.9)                                                                 | 0.56 | -0.3 (-1.7; 1.0)                                                             | 0.64 | -0.1 (-1.2; 1.0)                                                                      | 0.81 |
| <b>Saturated fat</b> (E%)     |                                                                                    |      |                                                                                  |      |                                                                              |      |                                                                                       |      |
| Model 1                       | 0.0 (-0.5; 0.4)                                                                    | 0.94 | 0.5 (-1.5; 2.5)                                                                  | 0.63 | 0.0 (-0.7; 0.6)                                                              | 0.91 | 0.2 (-0.4; 0.7)                                                                       | 0.55 |
| Model 2                       | -0.2 (-0.7; 0.3)                                                                   | 0.50 | -0.2 (-2.4; 2.0)                                                                 | 0.87 | -0.2 (-0.9; 0.5)                                                             | 0.59 | 0.0 (-0.6; 0.6)                                                                       | 0.95 |
| Model 3                       | -0.1 (-0.6; 0.4)                                                                   | 0.72 | 0.0 (-2.2; 2.3)                                                                  | 0.99 | -0.1 (-0.8; 0.7)                                                             | 0.89 | 0.0 (-0.6; 0.6)                                                                       | 0.97 |
| <b>Protein</b> (E%)           |                                                                                    |      |                                                                                  |      |                                                                              |      |                                                                                       |      |
| Model 1                       | 0.0 (-0.4; 0.5)                                                                    | 0.96 | -0.5 (-2.5; 1.5)                                                                 | 0.64 | -0.1 (-0.7; 0.5)                                                             | 0.74 | 0.0 (-0.6; 0.5)                                                                       | 0.94 |
| Model 2                       | -0.1 (-0.6; 0.4)                                                                   | 0.72 | -0.9 (-3.1; 1.3)                                                                 | 0.41 | -0.2 (-1.0; 0.5)                                                             | 0.51 | -0.1 (-0.7; 0.5)                                                                      | 0.64 |

## Supplementary material

|                                              |                     |      |                     |      |                     |      |                     |      |
|----------------------------------------------|---------------------|------|---------------------|------|---------------------|------|---------------------|------|
| Model 3                                      | -0.1 (-0.6; 0.5)    | 0.84 | -0.6 (-2.8; 1.7)    | 0.60 | -0.2 (-1.0; 0.5)    | 0.55 | -0.1 (-0.7; 0.5)    | 0.75 |
| <b>Carbohydrate (E%)</b>                     |                     |      |                     |      |                     |      |                     |      |
| Model 1                                      | 0.1 (-0.7; 0.9)     | 0.82 | 0.4 (-3.2; 4.1)     | 0.81 | 0.3 (-0.8; 1.5)     | 0.55 | 0.0 (-1.0; 1.0)     | 0.78 |
| Model 2                                      | 0.4 (-0.5; 1.4)     | 0.40 | 1.5 (-2.5; 5.5)     | 0.46 | 0.7 (-0.6; 2.1)     | 0.26 | 0.4 (-0.7; 1.4)     | 0.85 |
| Model 3                                      | 0.5 (-0.5; 1.5)     | 0.30 | 2.0 (-2.0; 5.9)     | 0.32 | 0.7 (-0.6 ;2.0)     | 0.28 | 0.5 (-0.5; 1.6)     | 0.53 |
| <b>Alcohol (E%)</b>                          |                     |      |                     |      |                     |      |                     |      |
| Model 1                                      | 0.1 (-0.6; 0.9)     | 0.78 | 0.6 (-2.7; 3.9)     | 0.73 | 0.0 (-1.0; 1.1)     | 0.94 | -0.1 (-1.0; 0.8)    | 0.97 |
| Model 2                                      | 0.0 (-0.9; 0.9)     | 0.93 | 0.5 (-3.2; 4.2)     | 0.79 | -0.1 (-1.3; 1.1)    | 0.85 | -0.1 (-1.; 0.9)     | 0.51 |
| Model 3                                      | -0.1 (-1.0; 0.8)    | 0.83 | -0.2 (-3.8; 3.5)    | 0.94 | -0.2 (-1.4; 1.1)    | 0.79 | -0.3 (-1.3; 0.7)    | 0.31 |
| <hr/>                                        |                     |      |                     |      |                     |      |                     |      |
| <b>Vegetables, fruits &amp; berries (%)*</b> |                     |      |                     |      |                     |      |                     |      |
|                                              | -1.3 (-13.1;12.0)   | 0.84 | -10.0 (-39.5; 34.2) | 0.60 | -1.3 (-13.1; 12.0)  | 0.84 | -3.3 (-13.4; 7.9)   | 0.54 |
| Model 1                                      | 0.4 (-12.9; 15.7)   | 0.95 | -1.6 (-36.0; 51.3)  | 0.94 | 0.4 (-12.9; 15.7)   | 0.95 | -0.9 (-11.6; 11.2)  | 0.88 |
| Model 2                                      | 0.7 (-12.5; 15.8)   | 0.92 | 6.0 (-30.2; 60.8)   | 0.78 | 0.7 (-12.5; 15.8)   | 0.92 | 1.6 (-8.9; 13.3)    | 0.78 |
| Model 3                                      |                     |      |                     |      |                     |      |                     |      |
| <b>Cereals (%)*</b>                          |                     |      |                     |      |                     |      |                     |      |
| Model 1                                      | -18.9 (-32.0; -3.1) | 0.02 | -51.0 (-77.7; 7.6)  | 0.08 | -27.6 (-43.4; -7.4) | 0.01 | -11.0 (-28.5; 10.7) | 0.29 |
| Model 2                                      | -16.1 (-32.2; 3.7)  | 0.10 | -43.3 (-76.3; 35.5) | 0.20 | -25.2 (-43.8; -0.7) | 0.05 | -3.5 (-23.6; 21.9)  | 0.76 |
| Model 3                                      | -14.2 (-30.9; 6.7)  | 0.17 | -36.0 (-73.7; 55.7) | 0.32 | -25.1 (-44.2 ;0.6)  | 0.06 | -1.0 (-21.7; 25.0)  | 0.93 |
| <b>Milk products (%)*</b>                    |                     |      |                     |      |                     |      |                     |      |
| Model 1                                      | 1.6 (-8.7; 13.0)    | 0.77 | 3.9 (-35.0; 66.0)   | 0.87 | -1.0 (-14.7; 14.9)  | 0.89 | 8.0 (-5.1; 22.8)    | 0.24 |

## Supplementary material

|                                |                    |      |                     |      |                     |      |                    |      |
|--------------------------------|--------------------|------|---------------------|------|---------------------|------|--------------------|------|
| Model 2                        | -1.2 (-13.0; 12.3) | 0.86 | -3.5 (-42.8; 62.7)  | 0.89 | -4.3 (-19.5; 13.7)  | 0.61 | 7.0 (-6.9; 23.0)   | 0.33 |
| Model 3                        | 3.3 (-9.1; 17.2)   | 0.62 | 18.3 (-29.3; 98.2)  | 0.52 | 0.8 (-15.2; 20.0)   | 0.93 | 9.9 (-3.9; 25.6)   | 0.17 |
| <b>Meat (%)*</b>               |                    |      |                     |      |                     |      |                    |      |
| Model 1                        | -3.0 (-15.3; 11.2) | 0.67 | -19.3 (-55.6; 46.5) | 0.48 | -7.6 (-23.5; 11.6)  | 0.41 | -0.6 (-15.7; 17.2) | 0.94 |
| Model 2                        | -11.6 (-24.5; 3.6) | 0.13 | -38.1 (-67.6; 18.5) | 0.15 | -16.9 (-32.8; 2.8)  | 0.09 | -6.9 (-21.7; 10.8) | 0.42 |
| Model 3                        | -14.4 (-26.8; 0.2) | 0.05 | -43.1 (-70.0; 8.0)  | 0.08 | -19.9 (-35.3; -0.8) | 0.04 | -7.3 (-21.8; 9.7)  | 0.37 |
| <b>Sugar &amp; sweets (%)*</b> |                    |      |                     |      |                     |      |                    |      |
| Model 1                        | -2.0 (-18.0; 17.1) | 0.82 | -38.2 (-71.6; 34.4) | 0.22 | -6.3 (-26.9; 20.1)  | 0.61 | 6.9 (-13.8; 32.6)  | 0.54 |
| Model 2                        | -2.4 (-21.4; 21.4) | 0.83 | -42.0 (-76.1; 40.5) | 0.23 | -7.7 (-31.2; 23.7)  | 0.59 | 9.9 (-13.3; 39.2)  | 0.43 |
| Model 3                        | 2.8 (-18.0; 29.2)  | 0.81 | -31.1 (-72.6; 73.0) | 0.42 | -0.7 (-27.2; 35.4)  | 0.96 | 12.4 (-11.7; 42.9) | 0.34 |

---

Adjusted models were adjusted for:

Model 1: sex, age at clinical examination (and total energy intake in the analyses for food groups)

Model 2: model 1 + gestational age, birth weight SD score, duration of mechanical ventilation, bpd, sepsis, PDA, maternal smoking during pregnancy and pre-eclampsia

Model 3: model 2 + current BMI, smoking, living at parental home, parental education

\*values are backtransformed from natural logarithms and therefore presented as percentages

## Supplementary material

**Table S2. Sensitivity analysis results for effects of protein intake and fat intake on relative energy intake.**

| Independent variable | Effect   | Sensitivity model 1* | Sensitivity model 2** | Sensitivity model 3*** |
|----------------------|----------|----------------------|-----------------------|------------------------|
|                      |          | Estimate (95%CI)     | Estimate (95%CI)      | Estimate (95%CI)       |
| Protein intake       |          |                      |                       |                        |
| 0-2 weeks            | Indirect | -1.34 ( -4.06;-0.07) | -1.49 ( -4.27;-0.26)  | -1.18 ( -3.90;-0.25)   |
|                      | Direct   | -5.96 (-12.30;-0.50) | -5.96 (-11.79;-0.14)  | -5.96 (-11.79;-0.14)   |
|                      | Total    | -7.30 (-13.28;-1.71) | -7.46 ( -13.44;-1.96) | -7.14 (-13.20;-1.83)   |
| Fat intake           |          |                      |                       |                        |
| 0-2 weeks            | Indirect | -0.43 ( -1.18;-0.01) | -0.47 ( -1.30;-0.08)  | -0.38 ( -0.90;-0.20)   |
|                      | Direct   | -2.45 ( -4.82;-0.31) | -2.47 ( -4.61;-0.41)  | -2.47 ( -4.63;-0.48)   |
|                      | Total    | -2.88 ( -5.22;-0.72) | -2.94 ( -5.07;-0.91)  | -2.85 ( -4.73;-0.50)   |

\*) Corresponds to model 3 in table 4 additionally adjusted for age at hospital discharge

\*\*) Corresponds to model 3 in table 4 with multiple imputation

\*\*\*) Corresponds to model 3 in table 4 additionally adjusted for age at hospital discharge, with multiple imputation

## Supplementary material

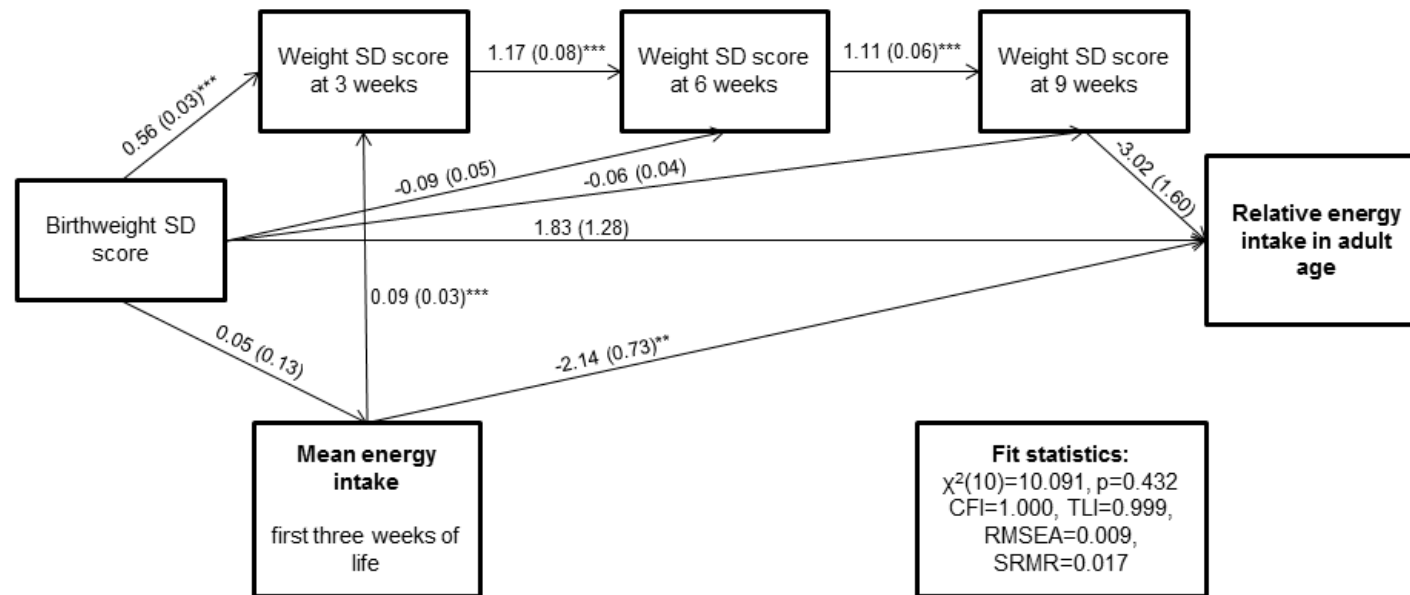

**Figure S1.** Graphical representation of path model estimated for total energy intake, body weight with four time points and relative energy intake (n= 109). Paths represent path coefficient and standard error in parenthesis. Significance of estimated path is noted as \*)  $p<0.05$ , \*\*)  $p<0.01$  and \*\*\*)  $p<0.001$ . Note that figure also includes some nonsignificant paths: most of the paths from birth weight SD score and path from weight SD score at 9 weeks to outcome.

## Supplementary material

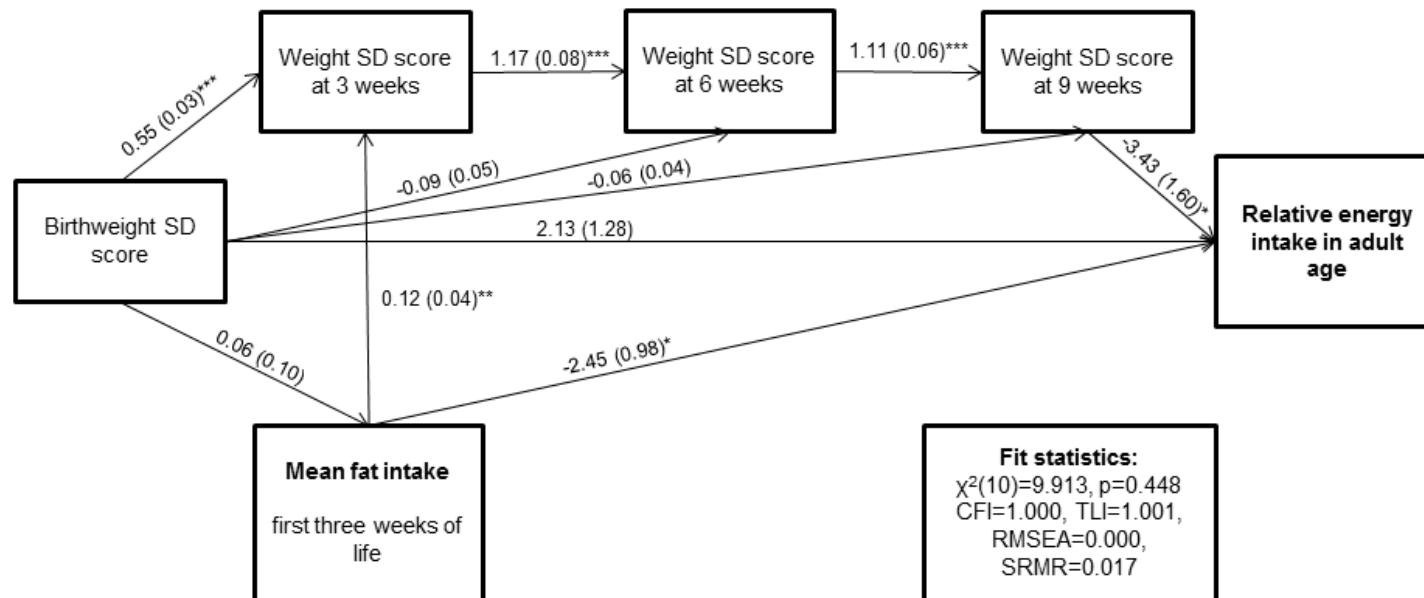

**Figure S2.** Graphical representation of path model estimated for protein intake during the first three weeks of life, body weight with four time points and relative energy intake in adult age (N= 109). Paths represent path coefficient and standard error in parenthesis. Significance of estimated path is noted as \*)  $p<0.05$ , \*\*)  $p<0.01$  and \*\*\*)  $p<0.001$ . Note that figure also includes some nonsignificant paths: most of the paths from birth weight SD score.
